# Supplementary material
Source: publisher figshare collection journal article supplement (https://frontiersin.figshare.com/ndownloader/files/18148046)
Supplement: Supplementary file [file 18148046]

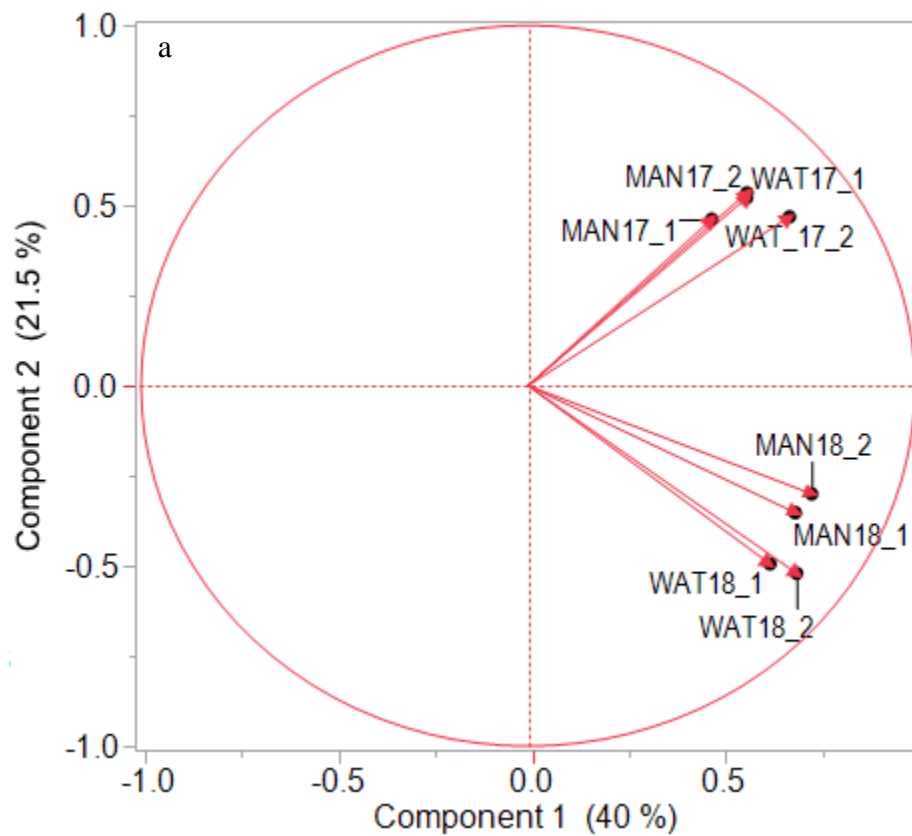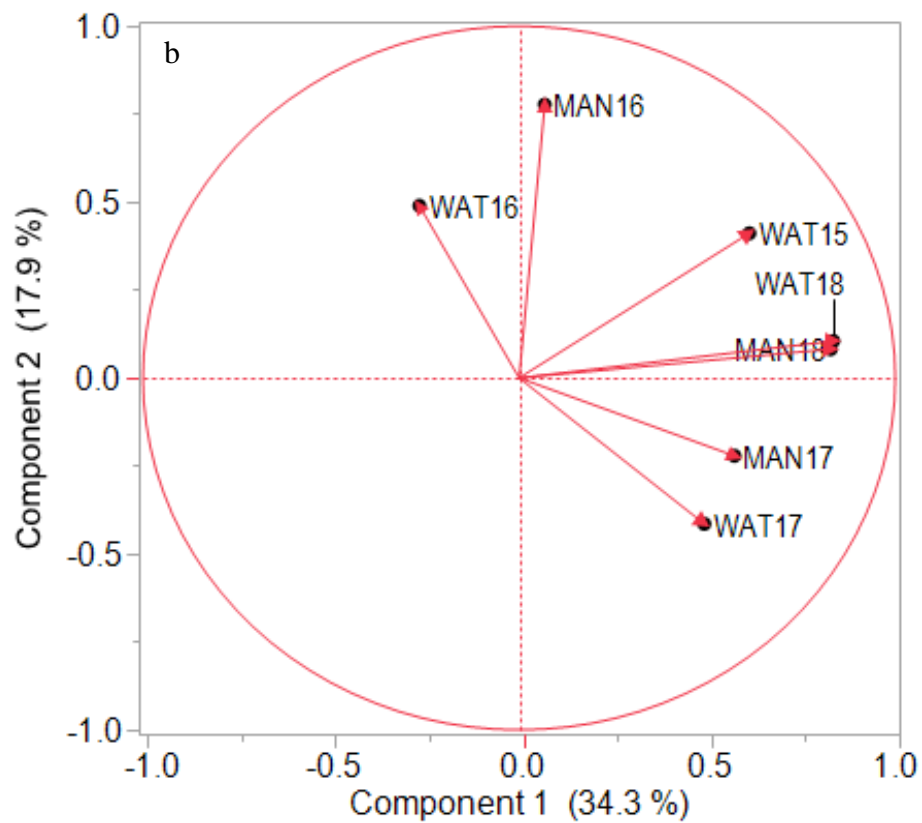

Supplementary Fig. 1. PCA bi-plots for tolerance to snow mold across environments in Mansfield and Waterville, WA for the association mapping panel (a) and Washington State University (WSU) winter wheat breeding lines (b)
